# Supplementary material for: Competition-function tradeoffs in ectomycorrhizal fungi
Source: PeerJ. 2016 Jul 27;4:e2270. doi: 10.7717/peerj.2270 (PMC4974999; doi:10.7717/peerj.2270)
Supplement: Data S1 [file peerj-04-2270-s001.xls]

## Sheet: SeedlingData
Seedling.ID	Treatment	WetSoil.g	DrySoil.g	PctMoisture	Shoot.DryWeight	CountedRoots.DryWeight	UncountedRoots.DryWeight	Root.DryWeight	Uninf.RootCrossings	Inf.RootCrossings	TotCount.RootCrossings	Tot.RootCrossings	Prop.T	Prop.R	Prop.S	Thelephora	Suillus	Rhizopogon
26	S	5.52	4.85	0.121377	0.25079	0.03292	0.13407	0.16699	68	32	100	124.554	0	0	1	0	0	1
34	S	5.79	5.212	0.0998273	0.33043	0.05255	0.25957	0.31212	88	60	148	177.963	0	0	1	0	0	1
2	S	4.24	3.696	0.128302	0.3185	0.03354	0.19045	0.22399	130	15	145	170.536	0	0	1	0	0	1
35	T	4.34	3.741	0.138018	0.25429	0.05844	0.21995	0.27839	52	111	163	206.309	1	0	0	1	0	0
19	T	2.88	2.561	0.110764	0.4137	0.06442	0.44079	0.50521	51	110	161	184.53	1	0	0	1	0	0
25	R	2.87	2.513	0.12439	0.16352	0.04827	0.06978	0.11805	78	15	93	157.332	0	1	0	0	1	0
33	R	2.17	1.849	0.147926	0.32183	0.04094	0.14748	0.18842	79	20	99	126.482	0	1	0	0	1	0
1	R	5.5	5.018	0.0876364	0.33705	0.06403	0.17264	0.23667	69	36	105	143.943	0	1	0	0	1	0
54	RST	3.45	2.975	0.137681	0.28547	0.07093	0.23828	0.30921	62	60	122	158.316	1	0	0	1	0	0
38	RST	2.49	2.187	0.121687	0.21719	0.03726	0.15812	0.19538	90	64	154	190.289	1	0	0	1	0	0
15	ST	3.84	3.419	0.109635	0.23427	0.05864	0.22494	0.28358	63	75	138	173.975	1	0	0	1	0	0
44	RS	1.95	1.746	0.104615	0.16143	0.03942	0.07725	0.11667	77	34	111	167.642	0	0.75	0.25	0	0.75	0.25
47	ST	5.03	4.35	0.135189	0.2292	0.07189	0.29392	0.36581	77	75	152	189.178	1	0	0	1	0	0
12	RS	5.35	4.587	0.142617	0.31474	0.10515	0.11585	0.221	94	53	147	280.423	0	1	0	0	1	0
20	RS	3.53	3.174	0.10085	0.2661	0.05773	0.18507	0.2428	98	57	155	203.35	0	0.875	0.125	0	0.875	0.125
24	ctrl	2.41	2.173	0.0983402	0.15507	0.03082	0.09161	0.12243	94	0	94	125.624	0	0	0	0	0	0
8	ctrl	3	2.632	0.122667	0.16813	0.02342	0.11646	0.13988	104	0	104	124.914	0	0	0	0	0	0
28	RS	2.76	2.5	0.0942029	0.34229	0.05774	0.17998	0.23772	89	60	149	196.801	0	0.8	0.2	0	0.8	0.2
36	RS	4.31	3.852	0.106265	0.18897	0.02888	0.10415	0.13303	111	11	122	155.83	0	0	1	0	0	1
39	ST	2.84	2.457	0.134859	0.22921	0.0518	0.15511	0.20691	77	73	150	200.093	1	0	0	1	0	0
37	RT	3.45	2.987	0.134203	0.28695	0.05991	0.1547	0.21461	67	91	158	219.188	1	0	0	1	0	0
16	ctrl	2.66	2.274	0.145113	0.28663	0.04584	0.14712	0.19296	86	0	86	112.796	0	0	0	0	0	0
21	RT	3.29	2.721	0.172948	0.30999	0.06647	0.21195	0.27842	72	113	185	243.018	1	0	0	1	0	0
29	RT	4.86	4.077	0.161111	0.26851	0.04888	0.24419	0.29307	94	121	215	258.037	1	0	0	1	0	0
n1	neg ctrl	3.73	3.495	0.0630027
n2	neg ctrl	4.4	4.193	0.0470455
n3	neg ctrl	2.6	2.315	0.109615
n4	neg ctrl	4.89	4.526	0.0744376
n5	neg ctrl	3.87	3.507	0.0937985
n6	neg ctrl	4.93	4.372	0.113185
n7	neg ctrl	3.38	3.114	0.0786982

## Sheet: EnzymeData
TipNumber	Plate	Column	Well	SeedlingID	TreatmentGroup	TipSp	ImageJArea.px	SurfaceArea	AG.Surface	BG.Surface	NAG.Surface	BX.Surface	AP.Surface
1	1	1	A	26	S	S	164	0.026	105.599	530.137	556.537	230.463	521.932
2	1	1	B	2	S	S	146	0.025	15.2	37.12	5.56	73.834	194.417
3	1	1	C	19	T	T	1645	0.262	41.28	138.214	92.9332	78.6834	107.661
4	1	1	D	1	R	R	173	0.03	73.8957	484.496	345.98	149.647	184.739
5	1	1	E	54	RST	T	567	0.069	43.4206	208.634	92.3529	130.598	230.344
6	1	1	F	38	RST	T	1514	0.192	75.6059	216.576	87.1038	110.269	136.984
7	1	1	G	15	ST	T	1265	0.183	31.7297	107.1	67.9705	83.6833	151.02
8	1	1	H	47	ST	T	1330	0.192	30.6771	106.428	90.4372	88.6739	142.564
9	1	2	A	26	S	S	252	0.046	93.5626	390.382	328.478	189.848	355.195
10	1	2	B	35	T	T	793	0.126	33.937	176.31	155.035	91.0629	165.562
11	1	2	C	19	T	T	1223	0.193	30.374	124.043	79.0109	72.4988	123.082
12	1	2	D	1	R	R	782	0.103	42.8659	274.846	237.204	93.0263	137.963
13	1	2	E	54	RST	T	725	0.178	18.0822	81.6567	39.239	58.7542	115.867
14	1	2	F	38	RST	T	666	0.096	25.7011	82.4177	28.4066	69.084	106.428
15	1	2	G	15	ST	T	617	0.08	30.8414	154.903	112.003	99.7709	227.194
16	1	2	H	47	ST	T	579	0.074	31.4619	185.512	113.188	104.288	171.16
17	1	3	A	26	S	S	346	0.073	89.8337	344.722	238.625	160.417	241.928
18	1	3	B	35	T	T	558	0.097	23.4281	142.959	97.5374	84.5802	161.702
19	1	3	C	25	R	R	189	0.022	37.5455	259.717	83.4805	81.3723	108.989
20	1	3	D	1	R	R	935	0.097	39.78	303.035	259.335	95.0511	150.944
21	1	3	E	54	RST	R	409	0.057	79.4123	442.463	152.804	151.746	192.672
22	1	3	F	38	RST	T	444	0.056	34.1211	191.475	147.085	122.405	292.762
23	1	3	G	44	RS	R	682	0.116	47.8973	190.07	60.2116	100.832	149.01
24	1	3	H	47	ST	T	276	0.038	48.8189	168.67	82.0161	159.516	272.166
25	1	4	A	26	S	S	740	0.11	125.136	371.446	353.401	180.832	251.749
26	1	4	B	35	T	T	635	0.089	27.7226	82.334	51.5891	79.2075	157.321
27	1	4	C	25	R	R	285	0.033	39.3512	238.917	72.5185	79.1239	95.0048
28	1	4	D	1	R	R	153	0.015	17.9333	123.057	37.1333	44.2	67.0933
29	1	4	E	54	RST	T	857	0.1	40.5344	143.401	60.106	110.565	202.347
30	1	4	F	38	RST	T	690	0.081	27.7123	163.984	96.5351	83.9385	157.571
31	1	4	G	44	RS	R	462	0.051	39.6486	270.266	68.2031	117.764	183.966
32	1	4	H	47	ST	T	276	0.029	29.4138	178.796	165.042	150.009	340.319
33	1	5	A	34	S	S	466	0.077	23.7312	62.2791	21.6832	72.3979	137.568
34	1	5	B	35	T	T	647	0.069	24.0628	68.6933	39.5222	69.9032	132.95
35	1	5	C	33	R	R	854	0.106	100.982	445.842	405.852	179.649	249.567
36	1	5	D	54	RST	T	2184	0.255	36.3022	125.203	68.3122	83.8988	134.624
37	1	5	E	38	RST		334	0.045	35.0411	99.146	30.9187	92.3438	131.198
38	1	5	F	15	ST	T	983	0.113	31.1923	109.173	37.4308	87.0102	164.047
39	1	5	G	44	RS	R	916	0.248	25.9942	95.636	30.632	58.2157	84.9579
40	1	5	H	47	ST	T	483	0.071	22.6011	103.599	64.2761	77.1444	128.617
41	1	6	A	34	S	S	964	0.148	43.1818	257.273	133.306	86.6455	147.532
42	1	6	B	35	T	T	1462	0.219	30.1987	113.129	62.7692	73.0402	118.19
43	1	6	C	33	R	R	1125	0.17	64.4382	286.507	136.679	94.6658	99.2218
44	1	6	D	54	RST	T	606	0.09	23.3951	152.532	74.8233	87.4484	219.574
45	1	6	E	38	RST	T	909	0.117	35.3583	100.922	40.4321	99.8516	157.249
46	1	6	F	15	ST	T	741	0.09	31.7432	98.4246	50.7067	91.1587	175.979
47	1	6	G	44	RS	R	539	0.138	13.2413	79.3132	21.5759	36.4639	75.65
48	1	6	H	47	ST	T	1073	0.144	47.0866	174.755	118.844	110.502	166.51
49	1	7	A	34	S	S	555	0.099	54.1545	236.481	148.972	135.995	284.358
50	1	7	B	19	T	T	2825	0.481	36.1961	72.0451	49.0585	53.4167	66.4238
51	1	7	C	33	R	R	1270	0.165	45.4786	230.26	89.7205	81.9346	118.081
52	1	7	D	54	RST		1342	0.167	28.7711	131.858	59.986	86.9519	154.242
53	1	7	E	38	RST	T	643	0.081	24.964	127.225	72.8307	79.129	153.964
54	1	7	F	15	ST	T	739	0.079	49.5482	239.64	154.281	143.655	294.354
55	1	7	G	44	RS	S	509	0.066	68.1617	122.41	69.1455	156.983	303.847
56	1	7	H	47	ST	T	203	0.023	28.6522	109.291	29.0435	95.9826	216.162
57	1	8	A	34	S	S	551	0.095	29.7796	164.715	87.5814	72.8868	134.643
58	1	8	B	19	T	T	1386	0.207	43.5102	160.016	128.783	95.624	150.247
59	1	8	C	33	R	R	539	0.064	37.6822	415.374	250.442	127.975	319.864
60	1	8	D	54	RST	T	327	0.045	26.384	209.835	93.3744	110.895	291.357
61	1	8	E	38	RST	T	691	0.073	36.0859	138.88	56.416	95.0433	192.755
62	1	8	F	15	ST	T	417	0.053	30.277	103.082	39.3775	82.8679	188.838
63	1	8	G	44	RS	R	371	0.039	70.3995	362.7	118.443	157.21	291.944
64	1	8	H	47	ST	T	1892	0.257	52.9107	96.5097	50.7813	89.6342	117.497
65	1	9	A	2	S	S	318	0.062	17.3544	36.9529	4.48387	80.4884	189.028
66	1	9	B	19	T	T	520	0.074	55.9043	255.455	182.003	149.413	252.008
67	1	9	C	33	R	R	839	0.115	25.0845	186.399	66.0585	59.1219	89.2072
68	1	9	D	54	RST	T	798	0.102	25.0077	143.045	78.0243	92.7107	200.426
69	1	9	E	38	RST	T	920	0.104	26.1322	75.0076	25.6863	65.509	98.2412
70	1	9	F	15	ST	T	483	0.056	34.6179	143.275	86.9589	106.256	217.728
71	1	9	G	44	RS	R	344	0.053	37.6275	197.063	70.3547	130.909	220.865
72	1	9	H	12	RS		281	0.035	24.3714	75.7951	14.3143	83.7454	196.113
73	1	10	A	2	S	S	712	0.118	28.4557	28.1413	13.2059	84.8561	145.659
74	1	10	B	33	R	R	702	0.088	43.5322	342.881	161.902	103.982	146.302
75	1	10	C	33	R	R	1034	0.152	32.5257	232.379	100.689	65.7836	99.7128
76	1	10	D	54	RST		1018	0.131	89.5698	349.287	217.729	150.782	183.884
77	1	10	E	38	RST	T	205	0.03	61.8373	164.488	51.016	169.125	225.088
78	1	10	F	15	ST	T	626	0.088	57.7618	163.272	107.513	141.927	246.225
79	1	10	G	44	RS	R	460	0.05	38.772	235.044	65.6714	125.963	201.003
80	1	10	H	12	RS	R	821	0.118	59.1124	300.75	116.024	123.884	181.621
81	2	1	A	12	RS		206	0.0271949	71.6267	335.622	139.502	188.787	297.251
82	2	1	B	20	RS	R	529	0.0745402	33.5982	268.785	84.4932	77.2759	115.354
83	2	1	C	8	ctrl	C	750	0.106934	18.9963	15.093	18.8228	64.4053	119.182
84	2	1	D	28	RS		935	0.134052	89.4682	295.183	165.72	154.13	196.581
85	2	1	E	36	RS		465	0.0651591	99.0779	285.703	246.983	203.281	324.779
86	2	1	F	37	RT	T	1340	0.193417	49.4913	193.937	158.88	114.377	165.45
87	2	1	G	16	ctrl	C	420	0.058563	24.7084	76.5009	20.5903	56.3065	67.7103
88	2	1	H	21	RT	T	2062	0.299247	47.4246	98.7548	48.3855	80.0174	112.564
89	2	2	A	12	RS	R	261	0.0352568	41.8308	280.977	97.3424	121.152	231.648
90	2	2	B	20	RS	R	877	0.12555	120.129	374.127	190.019	195.929	242.695
91	2	2	C	8	ctrl	C	418	0.0582698	13.3688	41.0694	6.36693	58.0225	141.594
92	2	2	D	28	RS	R	321	0.0440516	84.6462	493.348	201.719	227.724	460.184
93	2	2	E	36	RS		395	0.0548985	71.4697	234.685	225.223	149.782	324.148
94	2	2	F	37	RT	T	707	0.100631	43.1375	212.922	171.536	138.399	263.941
95	2	2	G	16	ctrl	C	349	0.0481558	35.8266	135.795	35.4414	90.7224	242.408
96	2	2	H	21	RT	T	510	0.0717552	44.5973	165.592	90.4872	140.191	249.939
97	2	3	A	12	RS	R	295	0.0402405	55.3211	358.204	182.79	139.686	250.328
98	2	3	B	20	RS		1164	0.167619	15.4392	33.5346	10.6801	48.3098	87.4888
99	2	3	C	8	ctrl	C	469	0.0657454	49.0971	168.031	36.5406	93.327	69.6249
100	2	3	D	28	RS	R	481	0.0675044	26.7944	262.586	126.69	77.0857	106.353
101	2	3	E	39	ST	T	966	0.138596	34.3329	168.05	91.0189	83.9248	116.049
102	2	3	F	37	RT	T	344	0.0474229	61.0251	304.539	262.486	185.129	330.651
103	2	3	G	16	ctrl	C	283	0.0384815	21.6987	151.132	24.8171	52.0647	166.318
104	2	3	H	29	RT	T	841	0.120273	44.1905	170.052	134.962	105.27	176.646
105	2	4	A	12	RS	R	1256	0.181104	102.946	306.073	151.859	139.746	154.266
106	2	4	B	20	RS	R	390	0.0541656	56.511	390.953	163.026	135.369	197.788
107	2	4	C	8	ctrl	C	185	0.0241167	16.1714	17.2909	7.29785	100.961	324.806
108	2	4	D	28	RS	R	408	0.056804	104.343	448.725	199.052	233.425	327.971
109	2	4	E	39	ST	T	728	0.10371	29.783	167.697	101.781	92.3003	171.051
110	2	4	F	37	RT	T	673	0.0956477	37.821	168.449	97.5587	121.464	217.616
111	2	4	G	16	ctrl	C	868	0.124231	19.4874	35.6149	8.58643	64.9579	144.699
112	2	4	H	29	RT	T	331	0.0455174	35.4581	149.78	76.6219	121.658	255.848
113	2	5	A	12	RS	R	384	0.0532861	62.6658	448.583	153.183	140.215	231.864
114	2	5	B	24	ctrl	C	644	0.0913969	23.1391	10.0441	8.62173	108.388	228.042
115	2	5	C	8	ctrl	C	184	0.0239701	16.2703	53.4011	8.5106	89.3892	181.68
116	2	5	D	36	RS	S	461	0.0645728	42.6629	190.905	59.613	102.348	118.077
117	2	5	E	39	ST	T	675	0.0959409	23.4933	141.54	88.5593	71.6402	122.252
118	2	5	F	37	RT	T	406	0.0565109	36.4388	189.58	107.511	129.751	256.056
119	2	5	G	21	RT	T	1923	0.278873	47.3971	112.256	43.439	86.6618	106.868
120	2	5	H	29	RT	T	426	0.0594425	32.301	176.953	118.125	100.414	230.788
121	2	6	A	12	RS	R	654	0.0928627	119.563	476.153	281.776	198.971	247.216
122	2	6	B	24	ctrl	C	284	0.0386281	25.2148	102.294	30.4959	77.4407	107.336
123	2	6	C	8	ctrl	C	651	0.092423	14.753	42.4524	8.52602	76.3241	242.371
124	2	6	D	36	RS	S	912	0.13068	90.0728	236.148	232.6	167.795	239.13
125	2	6	E	39	ST	T	723	0.102977	40.8039	111.333	50.8923	103.901	178.348
126	2	6	F	37	RT	T	1345	0.19415	68.2236	184.892	164.874	120.538	174.214
127	2	6	G	21	RT	T	426	0.0594425	55.2395	233.129	180.855	157.994	354.375
128	2	6	H	29	RT	T	249	0.0334978	35.7202	137.067	70.887	123.775	292.824
129	2	7	A	20	RS	R	950	0.13625	20.0148	154.4	71.1412	54.326	96.398
130	2	7	B	24	ctrl	C	224	0.0298333	25.1732	57.83	13.3743	87.6778	72.2876
131	2	7	C	28	RS	R	862	0.123351	56.6231	293.944	115.352	125.766	198.406
132	2	7	D	36	RS	S	246	0.0330581	68.1821	303.032	281.427	202.021	344.278
133	2	7	E	39	ST	T	508	0.071462	28.0363	91.118	33.6176	94.4279	139.403
134	2	7	F	37	RT	T	1237	0.178319	34.7994	148.717	143.931	88.0128	175.557
135	2	7	G	21	RT	T	1842	0.267	45.6486	114.851	43.5989	87.0762	112.298
136	2	7	H	29	RT	T	892	0.127749	44.2184	207.805	173.461	112.071	202.468
137	2	8	A	20	RS	R	165	0.0211851	28.8882	208.848	68.7403	93.2594	173.383
138	2	8	B	24	ctrl	C	369	0.0510874	32.1367	69.1757	17.0688	137.534	272.345
139	2	8	C	28	RS	R	472	0.0661852	21.0219	108.473	36.2979	57.3899	77.571
140	2	8	D	36	RS	S	139	0.017374	40.0598	217.822	101.437	124.127	254.66
141	2	8	E	39	ST	T	816	0.116609	22.9089	105.238	31.3406	74.6926	128.385
142	2	8	F	37	RT	T	371	0.0513806	34.1197	223.674	174.029	126.189	297.058
143	2	8	G	21	RT	T	483	0.0677975	42.2753	163.766	88.3815	128.878	222.664
144	2	8	H	29	RT	T	570	0.08055	34.8915	187.24	122.754	117.111	230.595
145	2	9	A	20	RS	R	1081	0.155452	84.8486	281.934	148.992	142.846	161.642
146	2	9	B	24	ctrl	C	495	0.0695565	21.2032	79.212	17.336	68.2104	112.217
147	2	9	C	28	RS	R	818	0.116902	42.8465	174.956	46.7344	109.377	151.629
148	2	9	D	36	RS		262	0.0354034	99.8213	433.869	490.722	213.398	336.799
149	2	9	E	39	ST	T	1573	0.22757	27.7572	91.831	45.8951	69.7598	111.151
150	2	9	F	16	ctrl	C	231	0.0308594	29.7478	68.5315	15.6192	97.8377	169.976
151	2	9	G	21	RT	T	629	0.0891982	35.2522	127.282	69.9845	114.492	225.864
152	2	9	H	29	RT	T	621	0.0880256	37.9347	139.41	76.6069	114.752	208.483
153	2	10	A	20	RS	R	507	0.0713155	33.1664	200.169	66.463	113.741	206.998
154	2	10	B	24	ctrl	C	948	0.135957	16.9879	18.6253	7.02427	57.3086	86.5769
155	2	10	C	28	RS	R	169	0.0217714	25.584	310.587	148.69	93.304	161.684
156	2	10	D	36	RS	S	238	0.0318854	57.599	209.451	181.815	154.906	305.886
157	2	10	E	39	ST		345	0.0475695	27.4937	78.9712	29.4437	87.4533	114.07
158	2	10	F	16	ctrl	C	676	0.0960875	20.8511	22.2992	11.1013	81.6669	187.95
159	2	10	G	21	RT	T	528	0.0743936	43.0156	180.291	83.5375	149.432	293.067
160	2	10	H	29	RT	T	2148	0.311853	38.9938	68.1722	33.2235	73.6598	96.7259
