# Supplementary material for: Competition-function tradeoffs in ectomycorrhizal fungi
Source: PubMed Central journal article supplement (PMC4974999; doi:10.7717/peerj.2270), 2016-07-27

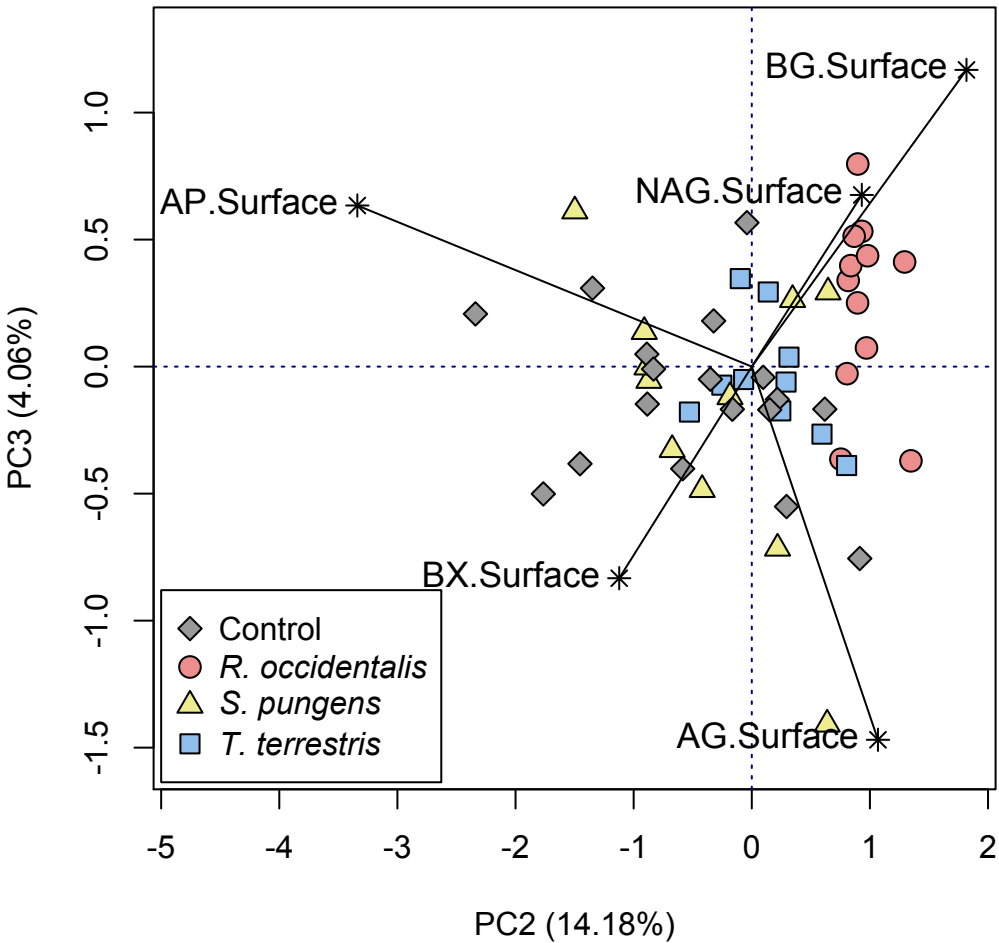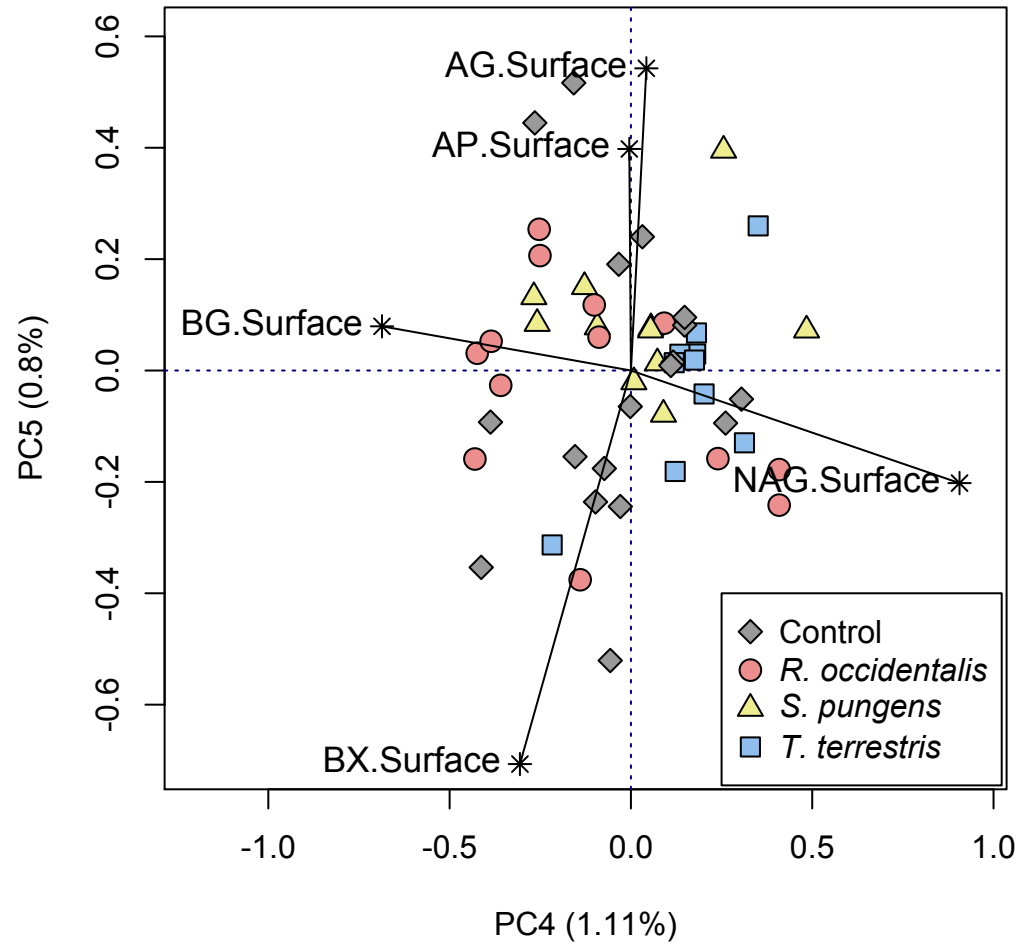

Supplement: peerj-04-2270-s002.pdf [file peerj-04-2270-s002.pdf]
